# Supplementary material for: Systematic review of clinical practice guidelines for the diagnosis and management of open angle glaucoma
Source: Research Square preprint supplement (doi:10.21203/rs.3.rs-4843576/v2), 2025-01-06
Supplement: Supplementary file 1 [file e58498a249831ca941bffc23.docx]

**eTable 1: List of sources used in systematic literature search**

**DATABASES**

1. Pubmed/medline
2. Scopus
3. Web of Science
4. Embase

**METASEARCH ENGINES**

1. Trip Database
2. Epistemonikos

**CPG DEVELOPER ORGANIZATIONS / CPG REPOSITORIES/DATABASES**

1. Guidelines International Network (GIN)
2. National Institute for Clinical Excellence (UK)
3. Guideline Central
4. ECRI Guidelines Trust Database
5. Canadian Medical Association Infobase of Clinical Practice Guidelines
6. WHO guidelines
7. US Preventive Services Task Force Guideline
8. Scottish Intercollegiate Guidelines Network (SIGN)
9. GuíaSalud, organismo del Sistema Nacional de Salud (SNS)
10. Instituto de Evaluación de Tecnologías en Salud e Investigación (IETSI)

**OPHTHALMOLOGY ASSOCIATIONS**

1. Pan American Association of Ophthalmology
2. European Society of Ophthalmology
3. American Academy of Ophthalmology
4. International Council of Ophthalmology
5. Royal Australian and New Zealand College of Ophthalmologists
6. Royal College of Ophthalmologists
7. European Glaucoma Society
8. Asia Pacific Glaucoma Society
9. American Glaucoma Society

**eTable 2: Systematic literature search strategy and retrieved records.**

| **N°** | **Source** | **URL** | **Search strategy** | | **Records retrieved** |
| --- | --- | --- | --- | --- | --- |
| **DATABASES**  **Date: 11-15th-2023 – Update: 11-17th-2024** | | | | | |
| 1 | Pubmed/Medline | https://pubmed.ncbi.nlm.nih.gov/ | (("Glaucoma, Open-Angle"[Mesh] OR "Glaucoma"[Mesh]) OR ("Open-Angle Glaucomas"[Title/Abstract] OR "Compensated Glaucoma"[Title/Abstract] OR "Open-Angle Glaucoma"[Title/Abstract] OR "Glaucoma, Open Angle"[Title/Abstract] OR "Open Angle Glaucoma"[Title/Abstract] OR "Open Angle Glaucomas"[Title/Abstract] OR "Glaucoma, Pigmentary"[Title/Abstract] OR "Pigmentary Glaucoma"[Title/Abstract] OR "Glaucoma, Simple"[Title/Abstract] OR "Simple Glaucoma"[Title/Abstract] OR "Glaucoma Simplex"[Title/Abstract] OR "Simplex, Glaucoma"[Title/Abstract] OR "Glaucoma, Primary Open Angle"[Title/Abstract] OR "Primary Open Angle Glaucoma"[Title/Abstract] OR "Chronic Primary Open Angle Glaucoma"[Title/Abstract] OR "Secondary Open Angle Glaucoma"[Title/Abstract] OR "Glaucoma, Secondary Open Angle"[Title/Abstract]) OR ("Open-Angle Glaucoma"[Other Term] OR "Glaucoma, Open Angle"[Other Term] OR "Open Angle Glaucoma"[Other Term] OR "Pigmentary Glaucoma"[Other Term] OR "Primary Open Angle Glaucoma"[Other Term] OR "Chronic Primary Open Angle Glaucoma"[Other Term] OR "Secondary Open Angle Glaucoma"[Other Term] OR "Open-Angle Glaucoma"[Other Term] OR "Glaucoma, Open Angle"[Other Term] OR "Open Angle Glaucoma"[Other Term] OR "Pigmentary Glaucoma"[Other Term] OR "Primary Open Angle Glaucoma"[Other Term] OR "Chronic Primary Open Angle Glaucoma"[Other Term] OR "Secondary Open Angle Glaucoma"[Other Term])) AND (("Practice Guideline"[Publication Type] OR "Guidelines as Topic"[MeSH Terms] OR "Guideline"[Publication Type] OR "practice patterns, physicians"[MeSH Terms] OR "Patient Care Planning"[MeSH Terms] OR "Consensus"[MeSH Terms] OR "Consensus Development Conference"[Publication Type] OR "Consensus Development Conferences as Topic"[MeSH Terms] OR "consensus development conference, nih"[Publication Type] OR "consensus development conferences, nih as topic"[MeSH Terms]) OR ("practice guideline*"[Title/Abstract] OR "guideline*"[Title/Abstract] OR "guidance"[Title/Abstract] OR "Clinical Practice Guideline"[Title/Abstract] OR "Clinical Guidelines"[Title/Abstract] OR "standards"[Title/Abstract] OR "physicians practice pattern"[Title/Abstract] OR "physicians practice patterns"[Title/Abstract] OR "Physician's Practice Patterns"[Title/Abstract] OR "Physician Practice Patterns"[Title/Abstract] OR "Physician's Practice Pattern"[Title/Abstract] OR "practice patterns physician"[Title/Abstract] OR "practice patterns clinical"[Title/Abstract] OR "Clinical Practice Patterns"[Title/Abstract] OR "practice pattern clinical"[Title/Abstract] OR "Clinical Practice Pattern"[Title/Abstract] OR "Physician Prescribing Pattern"[Title/Abstract] OR "Physician Prescribing Patterns"[Title/Abstract] OR "clinical pathway*"[Title/Abstract] OR "practice parameter*"[Title/Abstract]) OR ("Practice Guideline*"[Other Term] OR "Guideline*"[Other Term] OR "guidance"[Other Term] OR "Clinical Practice Guideline"[Other Term] OR "Clinical Guidelines"[Other Term] OR "standards"[Other Term] OR "Physicians' Practice Pattern"[Other Term] OR "Physicians' Practice Patterns"[Other Term] OR "Physician's Practice Patterns"[Other Term] OR "Physician Practice Patterns"[Other Term] OR "Physician's Practice Pattern"[Other Term] OR "Clinical Practice Patterns"[Other Term] OR "Clinical Practice Pattern"[Other Term] OR "Physician Prescribing Pattern"[Other Term] OR "Physician Prescribing Patterns"[Other Term] OR "clinical pathway*"[Other Term] OR "practice parameter*"[Other Term])) AND ("2017/01/01"[Date - Publication] : "3000"[Date - Publication]) | | 378  Update: 446 |
| 2 | Scopus | https://www.scopus.com/home.uri | ( TITLE-ABS-KEY ( guideline* OR "practice guideline*" ) AND TITLE-ABS-KEY ( "glaucoma*" OR "open angle glaucoma*" OR "primary open angle glaucoma" OR "chronic primary open angle glaucoma" OR "secondary open angle glaucoma*" ) AND PUBYEAR > 2016 ) | | 757  Update: 913 |
| **3** | Web of Science | https://www.webofscience.com › wos | (((((TI=(guideline* OR "practice guideline*"))) OR AB=(guideline* OR "practice guideline*")) OR AK=(guideline* OR "practice guideline*")) OR KP=(guideline* OR "practice guideline*")) AND ((((TI=(glaucoma* OR "open angle glaucoma*" OR "primary open angle glaucoma" OR "chronic primary open angle glaucoma" OR "secondary open angle glaucoma*" )) OR AB=(glaucoma* OR "open angle glaucoma*" OR "primary open angle glaucoma" OR "chronic primary open angle glaucoma" OR "secondary open angle glaucoma*" )) OR AK=(glaucoma* OR "open angle glaucoma*" OR "primary open angle glaucoma" OR "chronic primary open angle glaucoma" OR "secondary open angle glaucoma*" )) OR KP=(glaucoma* OR "open angle glaucoma*" OR "primary open angle glaucoma" OR "chronic primary open angle glaucoma" OR "secondary open angle glaucoma*" )) AND DOP=(2017-01-01/2024-11-17) | | 444  Update: 487 |
| 4 | Embase | https://www.embase.com | ('guideline':ab,ti OR 'practice guideline'/exp OR 'practice guideline' OR 'practice guideline':ab,ti) AND ('glaucoma'/exp OR 'glaucoma' OR 'glaucoma':ab,ti OR 'open angle glaucoma'/exp OR 'open angle glaucoma' OR 'open angle glaucoma':ab,ti OR 'primary open angle glaucoma':ab,ti OR 'secondary open angle glaucoma':ab,ti) AND [2017-2024]/py | | 757  Update: 843 |
| **METASEARCH ENGINES**  **Date: 11-15th-2023 – Update: 11-17th-2024** | | | | | |
| **1** | Trip Database  (Free mode) | https://www.tripdatabase.com/ | "glaucoma" AND "guideline" from_date:2016  Filter: Guidelines | | 215 records  Update: 233 records  Selected: 03  1. The Japan Glaucoma Society guidelines for glaucoma 5th edition – 2023  2. NICE. Glaucoma: diagnosis and management - 2022.  3. Malaysian Health Technology Assessment Section, Medical Development Division. Management of Glaucoma - 2017 |
| **2** | Epistemonikos | https://www.epistemonikos.org/en/ | (title:(glaucoma) OR abstract:(glaucoma)) AND (title:(guideline) OR abstract:(guideline))  Filter: "Publication year From: 2017 To: 2023 " | | 14 records  Update: 22  No CPG. |
| **CPG DEVELOPER ORGANIZATIONS / CPG repositories/databases**  **Date: 11-16th-2023 – Update: 11-17th-2024** | | | | | |
| 1 | Guidelines International Network | https://g-i-n.net/international-guidelines-library | “open angle glaucoma” | Records: 03  Update additional records: 00  Included: 01   1. Assessment of risk factors for the occurrence of open-angle glaucoma – Germany 2020 2. Glaucoma referral and safe discharge (SIGN CPG 144) – UK 2015 3. **Management of Glaucoma (Second Edition) – Malasya 2017** | |
| 2 | National Institute for Clinical Excellence | https://www.nice.org.uk/ | “glaucoma” | Records: 10  Update additional records: 00  Included: 01   1. **Glaucoma: diagnosis and management – 2017, Updated: 2022** 2. Ab interno canaloplasty for open-angle glaucoma - 2022 3. Trabeculectomy with a biodegradable collagen matrix implant for glaucoma - 2023 4. Repetitive short-pulse transscleral cyclophotocoagulation for glaucoma - 2021 5. High-intensity focused ultrasound for glaucoma - 2019 6. Microinvasive subconjunctival insertion of a trans-scleral gelatin stent for primary open-angle glaucoma - 2018 7. Ab externo canaloplasty for primary open-angle glaucoma - 2017 8. Trabecular stent bypass microsurgery for open-angle glaucoma - 2017 9. The SENSIMED Triggerfish contact lens sensor for continuous 24-hour recording of ocular dimensional changes in people with or at risk of developing glaucoma – 2014 10. Trabeculotomy ab interno for open angle glaucoma - 2011 | |
| 3 | Guideline Central | https://www.guidelinecentral.com/guidelines/ | “open angle glaucoma”/Filter: Specialty: Ophthalmology | Records: 05  Update additional records: 01  Included: 02   1. **Care of the Patient with Primary Open-Angle Glaucoma - AOA Board of Trustees - 2024** 2. **Primary Open-Angle Glaucoma Preferred Practice Pattern – AAO 2020** 3. Primary Open-Angle Glaucoma Suspect Preferred Practice Pattern – AAO 2020 4. Comprehensive Adult Medical Eye Evaluation Preferred Practice Pattern – AAO 2020 5. Primary Angle Closure – AAO 2015 6. Comprehensive Adult Medical Eye Exam – AAO 2015 | |
| 4 | ECRI Guidelines Trust Database | https://guidelines.ecri.org/ | “glaucoma” | Records: 03  Update additional records: 01  Included: 00   1. The management of angle-closure glaucoma – RCO 2022 2. Final recommendation statement: screening for primary open-angle glaucoma – USPSTF 2024 3. Retinal vein occlusion (RVO) – RCO 2024 4. Uveal melanoma – Cancer care Alberta 2021 | |
| 5 | Canadian Medical Association Infobase of Clinical Practice Guidelines | https://joulecma.ca/cpg/homepage | “glaucoma” | Records: 00  Update additional records: 00 | |
| 6 | WHO guidelines | https://www.who.int/publications/i?publishingoffices=c09761c0-ab8e-4cfa-9744-99509c4d306b | “glaucoma” | Records: 00  Update additional records: 00 | |
| 7 | US Preventive Services Task Force Guideline | https://www.uspreventiveservicestaskforce.org/uspstf/ | “open angle glaucoma”  Filter: Vision and Hearing Disorders | Records: 06  Update additional records: 00  Included: 00   1. Primary Open-Angle Glaucoma: Screening - 2022 2. Impaired Visual Acuity in Older Adults: Screening - 2022 3. Hearing Loss in Older Adults: Screening - 2021 4. Ocular Prophylaxis for Gonococcal Ophthalmia Neonatorum: Preventive Medication - 2019 5. Vision in Children Ages 6 Months to 5 Years: Screening - 2017 6. Hearing Loss in Newborns: Screening 2008 | |
| 8 | Scottish Intercollegiate Guidelines Network (SIGN) | https://www.sign.ac.uk/search-results | “glaucoma” | Records: 03  Update additional records: 00  Included: 00   1. Glaucoma referral and safe discharge 2. Glaucoma 3. Implementation support | |
| 9 | GuíaSalud, organismo del Sistema Nacional de Salud (SNS) | https://portal.guiasalud.es/ | “glaucoma” | Records: 01  Update additional records: 00  Included: 01   1. **Guía de Práctica Clínica sobre Glaucoma de Ángulo Abierto – España 2017** | |
| 10 | Instituto de Evaluación de Tecnologías en Salud e Investigación  (IETSI) | http://www.essalud.gob.pe/ietsi/guias_pract_clini.html | - | Record: 01  Update additional records: 00  Selecter:01   1. **Glaucoma de Ángulo Abierto - 2021** | |
| **OPHTHALMOLOGY ASSOCIATIONS**  **Date: 11-16th-2023 – Update: 11-17th-2024** | | | | | |
| 1 | Pan American Association of Ophthalmology | https://paao.org/es/resources/ | - | Records: 01  Update additional records: 00  Included: 00   1. Guía Latinoamericana de Glaucoma Primario de Ángulo Abierto para el Oftalmólogo General - 2019 | |
| 2 | European Society of Ophthalmology | https://soevision.org/ | - | Records: 0  Update additional records: 00 | |
| 3 | American Academy of Ophthalmology | https://www.aao.org/guidelines-browse | Subspeciality: Glaucoma  Guidelines | Records: 03  Update additional records: 00  Included: 01   1. Primary Angle-Closure Disease PPP 2020 2. Primary Open-Angle Glaucoma Suspect PPP 2020 3. **Primary Open-Angle Glaucoma PPP 2020** | |
| 4 | International Council of Ophthalmology | https://icoph.org/eye-care-delivery/ico-international-clinical-guidelines-and-resources/ | - | Records: 01  Update additional records: 00  Included: 00   1. ICO Guidelines for Glaucoma Eye Care | |
| **5** | Royal Australian and New Zealand College of Ophthalmologists | https://ranzco.edu/home/policies-and-guidelines/professional-and-clinical-guidelines/ | “glaucoma” | Record: 05  Update additional records: 00  Selected: 00  1. District Health Board (DHB) Glaucoma Referral Guidelines New Zealand - 2018  2. Guidelines For Collaborative Care Of Glaucoma Patients - 2018  3. Guidelines For Standalone Trans-Trabecular Micro-Bypass Glaucoma MBGS Stenting – 2020  4. Principles Of Collaborative Care Of Glaucoma - 2020  5. RANZCO Guidelines For The Use Of Trabecular Micro-Bypass Glaucoma Stents (MBGS) - 2020 | |
| **6** | Royal College of Ophthalmologists | https://www.rcophth.ac.uk/standards-and-guidance/ | Type: Clinical Guideline  Topic: Glaucoma | Record: 02  Update additional records: 00  Selected: 00  1. Management of Angle Closure Glaucoma Guideline - 2022  2. Designing Glaucoma Care Pathways using GLAUC-STRAT-FAST | |
| **7** | European Glaucoma Society | https://www.eugs.org/eng/guidelines.asp | - | Record: 01  Update additional records: 00  Selected: 01  **1. Terminology and Guidelines for Glaucoma**  **(5th edition) - 2020** | |
| 8 | Asia Pacific Glaucoma Society | https://www.apglaucomasociety.org/apgg-asia-pacific-glaucoma-guidelines | - | Record: 01  Update additional records: 01  Selected: 01   1. **Asia Pacific Glaucoma Guidelines Fouth Edition – 2024** 2. Asia Pacific Glaucoma Guidelines Third Edition – 2017 | |
| 9 | American Glaucoma Society | https://www.americanglaucomasociety.net/home | - | Records: 0  Update additional records: 00 | |

**eFigure 1: PRISMA flowchart summarizing the results of the screening and selection process of CPG for the diagnosis and management of OAG.**

**Identification of studies via other methods**

**Identification of studies via databases and registers**

Records identified in CPG developer organizations (n = 28)

- Guidelines International Network: 03
- National Institute for Clinical Excelence: 10
- Guideline Central: 06
- ECRI Guidelines Trust Database: 04
- Canadian Medical Association Infobase of Clinical Practice Guidelines: 00
- WHO guidelines: 00
- US Preventive Services Task Force Guideline: 00
- Scottish Intercollegiate Guidelines Network (SIGN): 03
- GuíaSalud, organismo del Sistema Nacional de Salud (SNS): 01
- Instituto de Evaluación de Tecnologías en Salud e Investigación (IETSI): 01

Records identified in Ophthalmology Associations (n = 14)

- Pan American Association of Ophthalmology: 01
- European Society of Ophthalmology: 00
- American Academy of Ophthalmology: 03
- International Council of Ophthalmology: 01
- Royal Australian and New Zealand College of Ophthalmologists: 05
- Royal College of Ophthalmologists: 02
- European Glaucoma Society: 01
- Asia Pacific Glaucoma Society: 01
- American Glaucoma Society: 00

Records identified from*:

Databases (n = 2689)

- PubMed/Medline: 446
- Embase: 913
- Web of Science: 487
- Scopus: 843

Metasearchers (n = 255)

- Epistemonikos: 22
- Tripdatabase: 233

Records removed *before screening*:

Duplicate records removed

(n = 1955)

**Identification**

Records screened

(n = 989)

Records excluded (Rayyan)

(n = 976)

Reports not retrieved

(n = 00)

Reports sought for retrieval

(n = 42)

Reports sought for retrieval

(n = 13)

Reports not retrieved

(n = 00)

**Screening**

Reports excluded:

Wrong topic = 04

Old version= 02

Reports assessed for eligibility

(n = 04)

Reports excluded:

Language (n = 01)

Wrong topic (n=32)

Already included (n = 05)

Reports assessed for eligibility

(n = 13)

**Studies included in review**

Databases and registers = 07

Vía Other methods = 04

**Included**
